# Supplementary material for: In situ UV-visible absorption during spin-coating of organic semiconductors: a new probe for organic electronics and photovoltaics
Source: Royal Society of Chemistry journal article supplement (doi:10.1039/c3tc32077d), 2013-12-13
Supplement: c3tc32077d.pdf [file c3tc32077d.pdf]

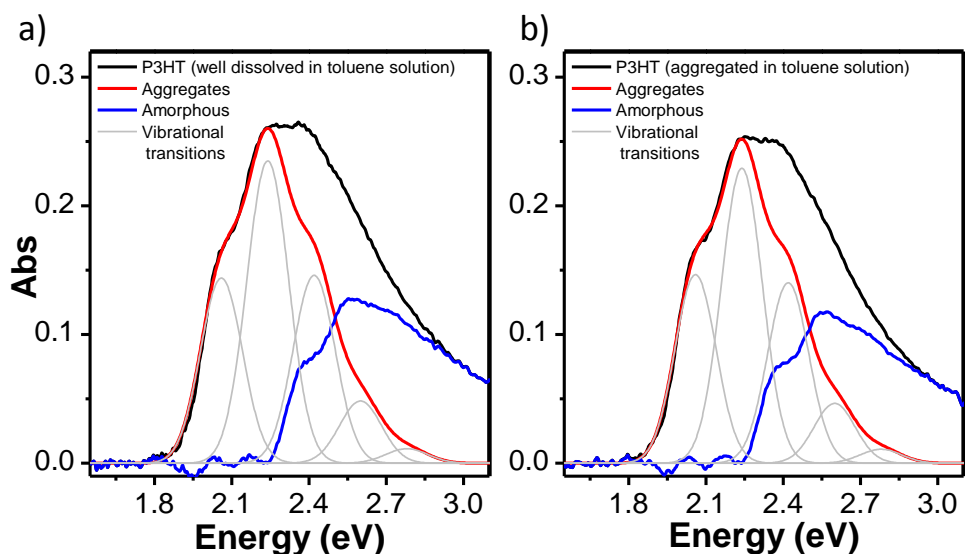

Figure S1 Absorption spectra of P3HT thin films fitted according to the Spano model. (a) P3HT in toluene solution stirred overnight at 65°C and spin coated at 900 rpm for 30 s. (b) P3HT in toluene solution stirred overnight at room temperature and spin coated at 900 rpm for 30 s.

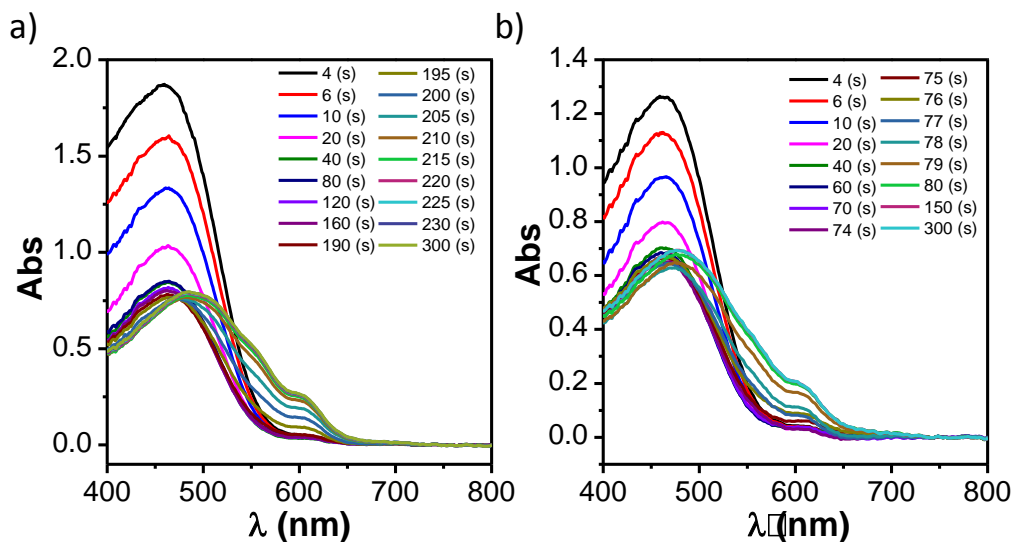

Figure S2 Absorption spectra taken during spin-coating of P3HT:PCBM blends spin coated from a) at 65°C oDCB solution (a) at 900 rpms for 45 s and (b) at 1200 rpms for 120 s.

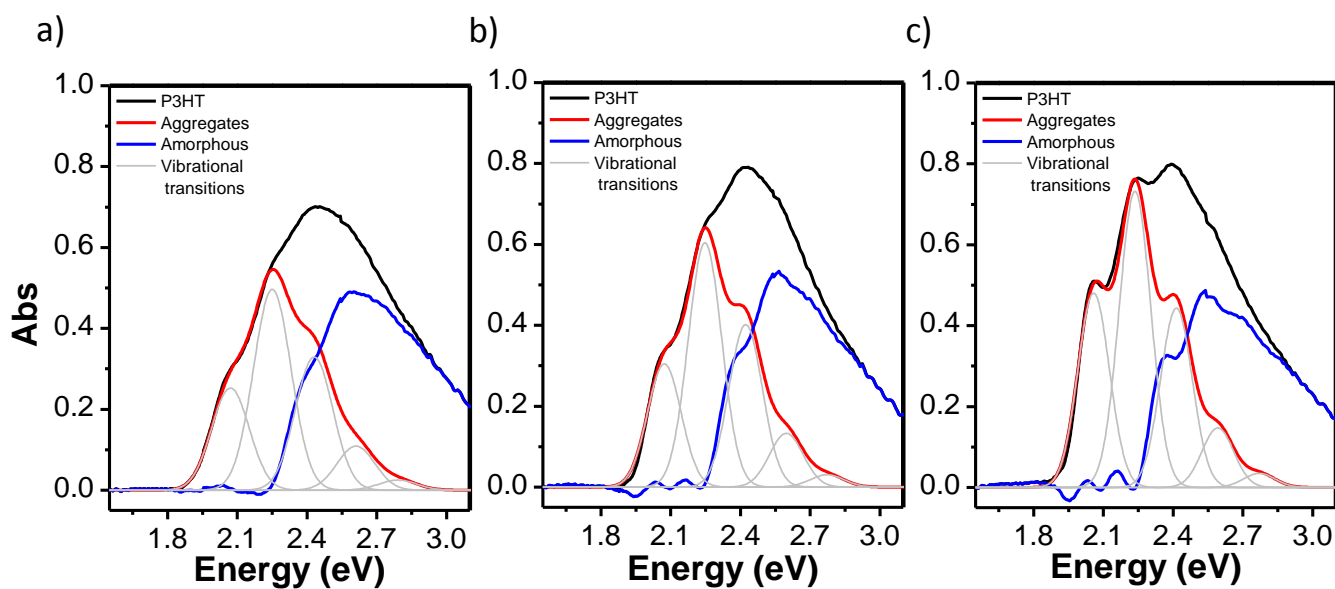

Figure S3 Absorption spectra of P3HT obtained by subtraction of the PCBM absorption from the absorption spectra of P3HT:PCBM blend thin films. The spectra are fitted according to the Spano analysis. Thin films were prepared from spin coating P3HT:PCBM (a) at 1200 rpm for 120 s, (b) at 900 rpm for 120 s and (c) at 900 rpm for 45 s.
